# Supplementary material
Source: publisher site journal article supplement (https://www.dovepress.com/article/supplementary_file/610202/610202%20Revised%20Supplementary%20Material%201.docx)
Supplement: Supplementary file 1 [file 610202%20Revised%20Supplementary%20Material%201.docx]

**Supplementary Material 1: Metagenomic next-generation sequencing (mNGS) Workflow**

Plasma was prepared from peripheral blood samples. Circulating cell-free DNA (cfDNA) and RNA were subsequently isolated from 1 ml plasma using the QIAamp Circulating Nucleic Acid Kit (Qiagen, Germany) and The QIAamp Viral RNA Mini Kit (Qiagen, Germany), respectively, following the manufacturer’s standard protocols. The quantity and quality of DNA and RNA were evaluated using Qubit 2.0 Fluorometers and Nanodrop 8000 spectrophotometers (Thermo Fisher Scientific, USA), respectively. According to the manufacturers’ protocol, a DNA library was constructed using Hieff NGS OnePot II DNA Library Prep Kit (Yeasen Biotech, China). The rRNA was removed from the total RNA, and the RNA library was constructed by the VAHTS Universal V8 RNA-seq Library Prep Kit (Vazyme Biotech, China) after purification. Finally, sequencing was performed in the single-end 50 bp sequencing mode using DIFSEQ-200 (Dinfectome, China). No-template negative controls (NTCs) were included in extraction, library preparation, and sequencing for background microbial filtration. Internal controls were added to each sample to verify the validity and stability of the detection workflow.

Raw sequencing data was split by bcl2fastq2 (version 2.20), and clean reads were screened using Trimmomatic (version 0.36) by removing low quality reads, adapter contamination, duplications, and short (length <36 bp) reads. Bowtie2 (version 2.2.6) was then used to align with the human genome (hs37d5), and the unaligned sequences were retained. Kraken2 (version 2.0.7) was used to identify the species contained in the sample, and Bracken (version 2.5.0) was used to predict the actual relative abundance of the species in the sample. The microorganism genome database containing genomes or scaffolds of bacteria, fungi, viruses, and parasites was downloaded from GenBank (release 238, http://ftp.ncbi.nlm.nih.gov/genomes/genbank/). The criteria for positive detection were as follows: 1) at least one species-specific read was required for Mycobacterium, Nocardia, and Legionella pneumophila detection; 2) for other bacteria, fungi, virus, and parasites, at least three unique reads were needed; 3) pathogens were excluded if the sample/NTC read ratio was <10-fold. Antimicrobial resistance genes were simultaneously analyzed from mNGS data using the Resistance Gene Identifier (RGI) aligned against the Comprehensive Antibiotic Resistance Database (CARD).
